# Supplementary material for: Hospital admissions for acute respiratory tract infections among infants from Nunavut and the burden of respiratory syncytial virus: a 10-year review in regional and tertiary hospitals
Source: bioRxiv or medRxiv preprint supplement (doi:10.1101/2024.02.21.24303174), 2024-03-06
Supplement: Supplementary file [file media-1.pdf]

## **Supplementary file 1: ICD-10 Diagnostic codes relating to ARI**

### **A15–A19 Tuberculosis**

- o A15 Respiratory tuberculosis, bacteriologically and histologically confirmed
- o A16 Respiratory tuberculosis, not confirmed bacteriologically or histologically
- o A19 Miliary tuberculosis

### **A30–A49 Other bacterial diseases**

- o A21.2 Pulmonary tularaemia
- o A22.1 Pulmonary anthrax
- o A31.0 Pulmonary mycobacterial infection
- o A36.0 Pharyngeal diphtheria
- o A36.1 Nasopharyngeal diphtheria
- o A36.0 Laryngeal diphtheria
- o A37 Whooping cough
- o A42.0 Pulmonary actinomycosis
- o A43.0 Pulmonary nocardiosis
- o A49.3 Mycoplasma infection, unspecified

### **A80–B34 Viral infections**

- o B01.2 Varicella pneumonia
- o B20.6 HIV disease resulting in Pneumocystis pneumonia
- o B25.0 Cytomegaloviral pneumonitis
- o B34.2 Coronavirus infection, unspecified site

### **B35-B49 Mycoses**

- o B37.1 Pulmonary candidiasis
- o B39 Histoplasmosis
- o B40 Blastomycosis
- o B44.0 Invasive pulmonary aspergillosis
- o B44.1 Other pulmonary aspergillosis
- o B45.0 Pulmonary cryptococcosis
- o B46.0 Pulmonary mucormycosis

### **B50-B64 Protozoal diseases**

- o B58.3 Pulmonary toxoplasmosis
- o B59 Pneumocystosis
- o B960 Mycoplasma pneumoniae as the cause of diseases classified to other chapters
- o B974 Respiratory syncytial virus as the cause of diseases classified to other chapters
- o B97.2 Coronavirus as the cause of diseases classified to other chapters
- o B97.8 Other viral agents as the cause of diseases classified to other chapters

### **J00–J06 Acute upper respiratory infections**

- o J00 Acute nasopharyngitis (common cold)

- o J01 Acute sinusitis
- o J02 Acute pharyngitis
- o J03 Acute tonsillitis
- o J04 Acute laryngitis and tracheitis
- o J05 Acute obstructive laryngitis (croup) and epiglottitis
- o J06 Acute upper respiratory infections of multiple and unspecified sites

**J09–J18 Influenza and Pneumonia**

- o J09 Influenza due to identified avian influenza virus
- o J10 Influenza due to identified influenza virus
- o J11 Influenza, virus not identified
- o J120 Adenoviral pneumonia
- o J13 Pneumonia due to *Streptococcus pneumoniae*
- o J14 Pneumonia due to *Haemophilus influenzae*
- o J15 Bacterial pneumonia, not elsewhere classified
- o J16 Pneumonia due to other infectious organisms, not elsewhere classified
- o J17 Pneumonia in disease classified elsewhere
- o J18 Pneumonia, organism unspecified

**J20–J22 Other acute lower respiratory infections**

- o J20 Acute bronchitis
- o J21 Acute bronchiolitis
- o J22 Unspecified acute lower respiratory infection

**J30–J39 Other diseases of upper respiratory tract**

- o J36 Peritonsillar abscess
- o J390 Retropharyngeal and parapharyngeal abscess

**J840–J849 Other interstitial pulmonary diseases**

- o J848 Other specified interstitial pulmonary diseases
- o J849 Interstitial pulmonary disease, unspecified

**J85–J86 Suppurative and necrotic conditions of lower respiratory tract**

- o J85 Abscess of lung and mediastinum
- o J86 Pyothorax, Empyema

**J90–J94 Other diseases of pleura**

- o J90 Pleural effusion, not elsewhere classified, Pleurisy with effusion
- o J91 Pleural effusion in conditions classified elsewhere

**P20–P29 Respiratory and cardiovascular disorders specific to the perinatal period**

- o P23 Congenital pneumonia
- o P284 Other apnoea of newborn
